# Supplementary material for: Regulated synthesis of Zr-metal–organic frameworks with variable hole size and its influence on the performance of novel MOF-based heterogeneous amino acid–thiourea catalysts
Source: Royal Society of Chemistry journal article supplement (doi:10.1039/d2ra03747e), 2022-01-01
Supplement: d2ra03747e1.pdf [file d2ra03747e1.pdf]

Electronic Supplementary Material (ESI) for RSC Advances.

This journal is © The Royal Society of Chemistry 2022

## Supplementary information

### **Regulated synthesis of Zr-metal-organic frameworks with variable hole size and its influence on the performance of Novel MOF-based heterogeneous amino acid-thiourea catalyst**

Junfeng Zhu,<sup>a</sup> Xiaorong Meng,<sup>\*a</sup> Wen Liu,<sup>\*a</sup> Yabing Qi,<sup>a</sup> Siyi Jin<sup>a</sup> and Shanshan Huo<sup>b</sup>

<sup>a</sup> College of Chemistry and Chemical Engineering, Xi'an University of Architecture and Technology, Xi'an 710055, PR China.

<sup>b</sup> Research Institute of Membrane Separation Technology of Shaanxi Province Co., Ltd, Xi'an 710055, China.

\* Corresponding author. E-mail addresses: mxr5@163.com (Xiaorong Meng); 24456132@qq.com (Wen Liu)

## Experiment section

### Synthesis and characterization of catalysts

#### 1. Synthesis of Zr-UiO-66-NHCS-Leu

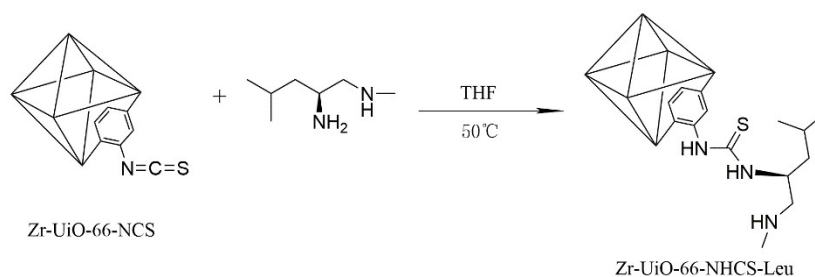

In a 50 mL round-bottomed flask, 1.20 mmol of 2-amino-4-methylpentylmethylamine was dispersed in 20 mL of anhydrous tetrahydrofuran, and the required amount of Zr-UiO-66-NH<sub>2</sub> was added (1.00 mmol). The solution was stirred at 50°C for 24 h. Then, it was centrifuged, and the solid was washed with THF (3×10 mL) to obtain as a fine yellow powder after drying in vacuo at 50°C.

<sup>1</sup>H NMR (500 MHz, Deuterium Oxide) δ 8.26 (d, *J* = 1.5 Hz, 1H), 7.95 (dd, *J* = 7.8, 1.5 Hz, 1H), 7.33 (d, *J* = 7.8 Hz, 1H), 3.52-3.49 (m, 5H), 2.03 (s, 3H), 1.71 – 1.53 (m, 6H), 0.66-0.62 (m, 1H).

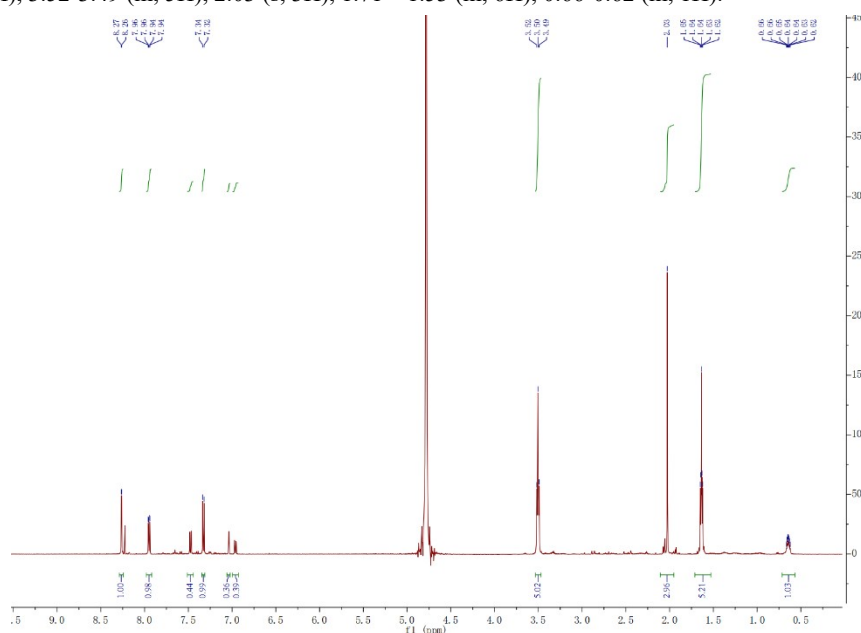

**Fig. S1** Representative <sup>1</sup>H NMR spectrum of Zr-UiO-66-NHCS-Leu dissolved in NaOH-D<sub>2</sub>O solution (ca. 64% modified). Unmodified Zr-UiO-66-NH<sub>2</sub> and functionalized linker were identified at a peak area of 6.9–8.5 ppm.

#### 2. Synthesis of Zr-UiO-66-NHCS-Ile

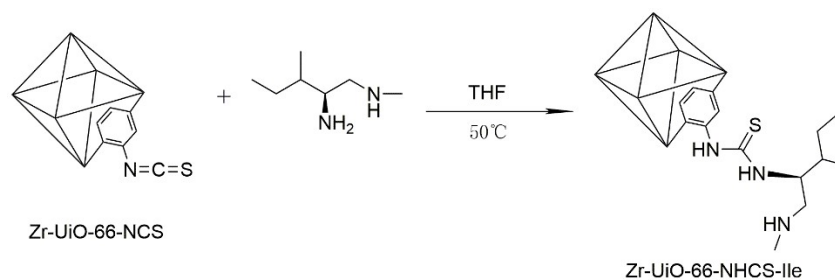

In a 50 mL round-bottomed flask, 1.20 mmol of 3-amino-4-methylpentylmethylamine was dispersed in 20 mL of anhydrous tetrahydrofuran, and add the required amount of Zr-UiO-66-NH<sub>2</sub> was added (1.00 mmol). The

solution was stirred at 50°C for 24 h. Then, it was centrifuged, and the solid was washed with THF (3×10 mL) to obtain as a fine yellow powder after drying in vacuo at 50°C.

$^1\text{H}$  NMR (500 MHz, Deuterium Oxide)  $\delta$  7.79 (s, 1H), 7.48 (d,  $J$  = 7.8 Hz, 1H), 6.86 (d,  $J$  = 7.8 Hz, 1H), 3.04 (m, 3H), 2.09 (s, 1H), 1.56 (s, 3H), 1.17 (m, 3H).

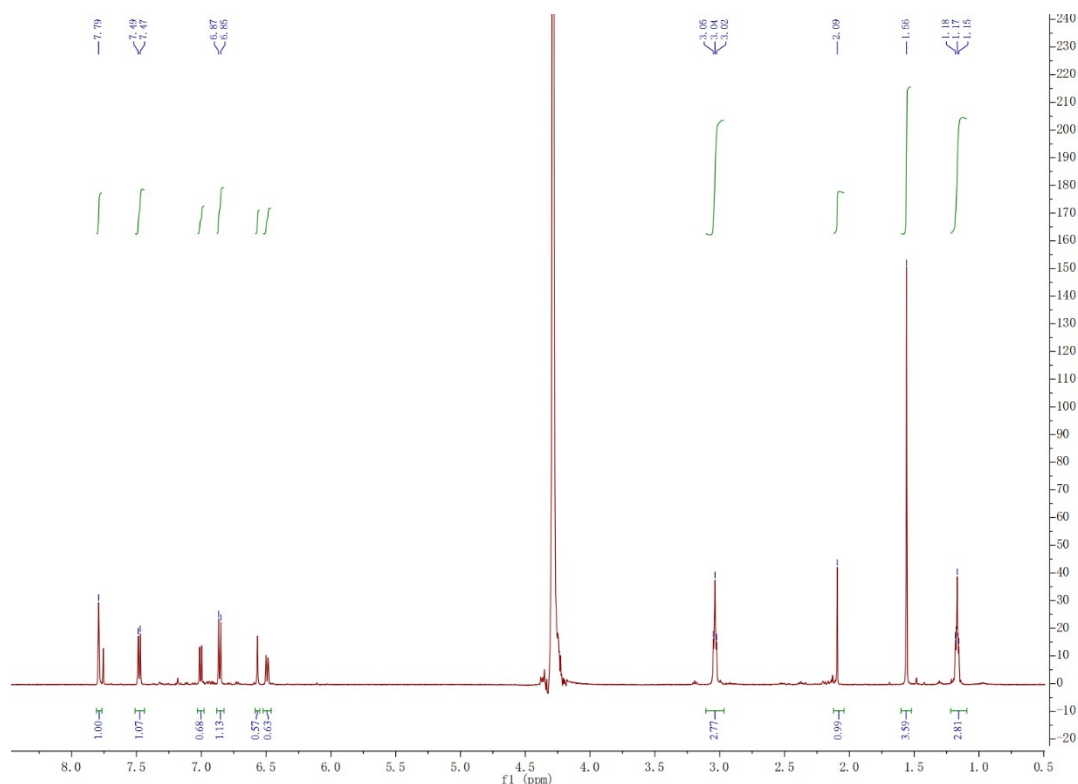

**Fig. S2** Representative  $^1\text{H}$  NMR spectrum of Zr-UiO-66-NHCS-IIe dissolved in NaOH- $\text{D}_2\text{O}$  solution (ca. 43% modified). Unmodified Zr-UiO-66- $\text{NH}_2$  and functionalized linker were identified at a peak area of 6.8-8.0 ppm.

### 3. Synthesis of Zr-UiO-66-NHCS-Lte

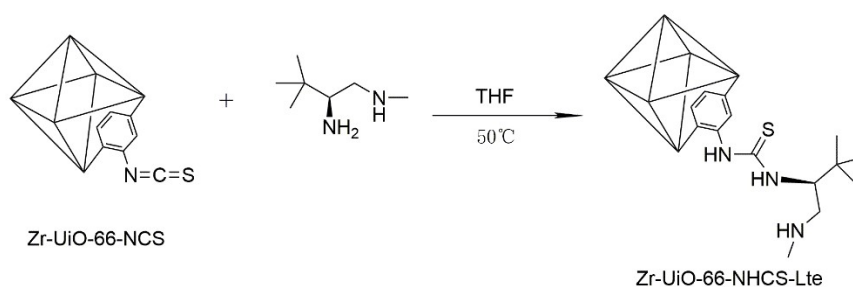

In a 50 mL round-bottomed flask, 1.20 mmol of 2-amino-3,3-dimethylbutylmethylamine was dispersed in 20 mL of anhydrous tetrahydrofuran, and the required amount of Zr-UiO-66- $\text{NH}_2$  was added (1.00 mmol). The solution was stirred at 50°C for 24 h. Then, it was centrifuged, and the solid was washed with THF (3×10 mL) to obtain as a fine yellow powder after drying in vacuo at 50°C.

$^1\text{H}$  NMR (500 MHz, Deuterium Oxide)  $\delta$  8.33 (d,  $J$  = 1.4 Hz, 1H), 8.01 (dd,  $J$  = 7.8, 1.4 Hz, 1H), 7.40 (d,  $J$  = 7.8 Hz, 1H), 2.69 (s, 2H), 2.52 (s, 1H), 2.10 (m, 12H).

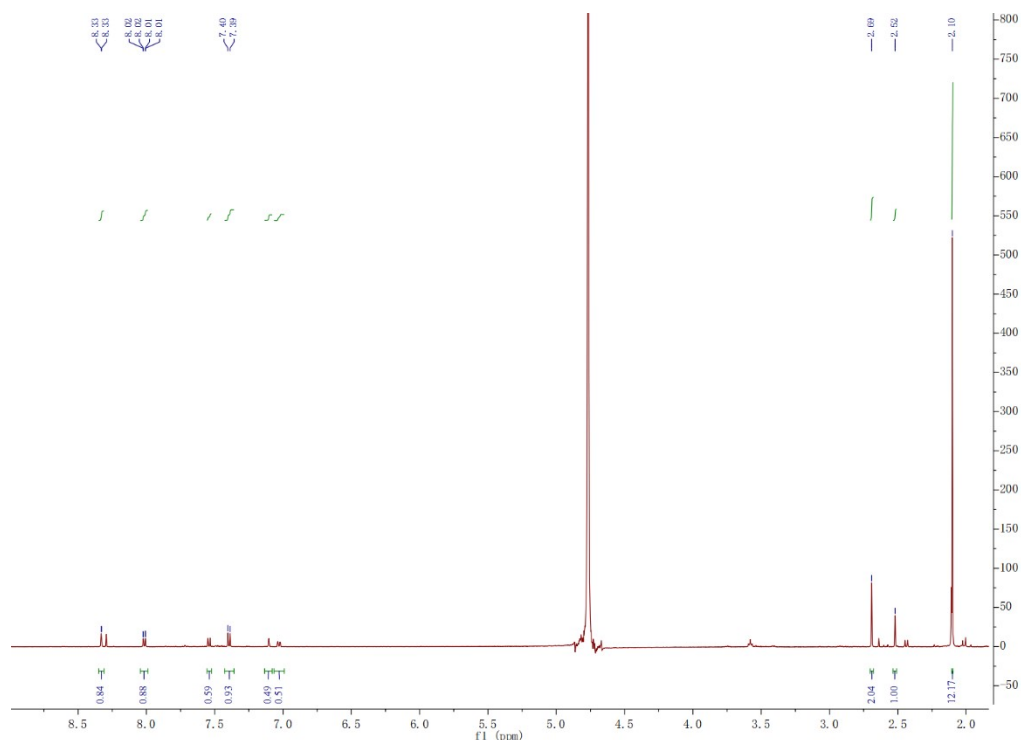

**Fig. S3** Representative  $^1\text{H}$  NMR spectrum of Zr-UiO-66-NHCS-Lte dissolved in NaOH- $\text{D}_2\text{O}$  solution (ca. 42% modified). Unmodified Zr-UiO-66- $\text{NH}_2$  and functionalized linker were identified at a peak area of 6.9–8.5 ppm.

#### 4. Synthesis of Zr-UiO-66-NHCS-Trp

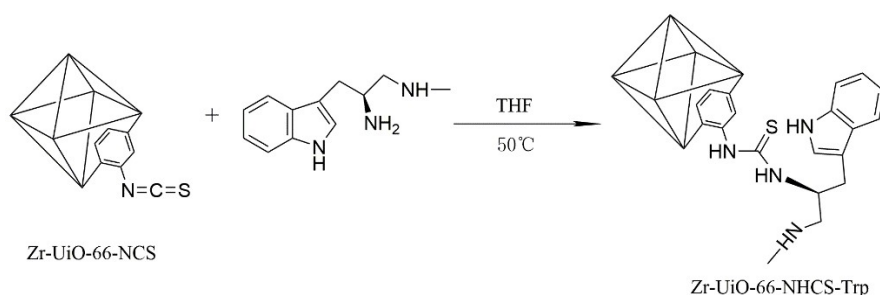

In a 50 mL round-bottomed flask, 1.20 mmol of  $\alpha$ -aminoindolylpropylmethylamine was dispersed in 20 mL of anhydrous tetrahydrofuran, and the required amount of Zr-UiO-66- $\text{NH}_2$  was added (1.00 mmol). The solution was stirred at  $50^\circ\text{C}$  for 24 h. Then it was centrifuged, and the solid was washed with THF ( $3 \times 10$  mL) to obtain as a fine yellow powder after drying in vacuo at  $50^\circ\text{C}$ .

$^1\text{H}$  NMR (500 MHz, Chloroform- $d$ )  $\delta$  8.33 (s, 1H), 7.64 (d,  $J = 7.8$  Hz, 1H), 7.37 (d,  $J = 8.1$  Hz, 1H), 7.26 (s, 1H), 7.19 (t,  $J = 8.0$  Hz, 1H), 7.12 (t,  $J = 7.5$  Hz, 1H), 7.08 – 6.99 (m, 1H), 5.78 (s, 1H), 5.18 (s, 1H), 4.40 (s, 1H), 3.31 (m, 1H), 3.19 – 3.10 (m, 1H), 2.96 (s, 1H), 2.81 (s, 3H), 2.67–2.65 (m, 3H).

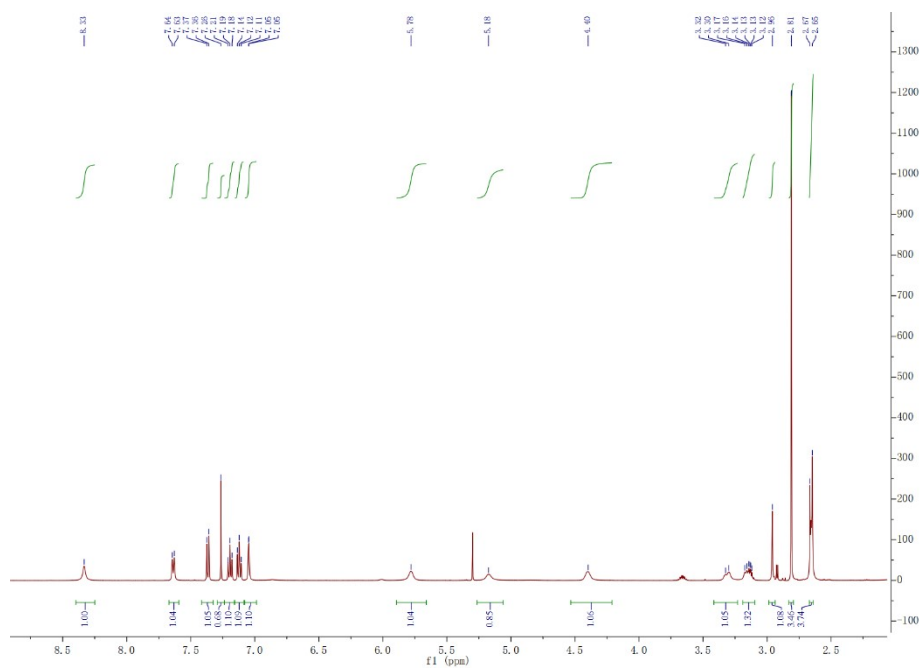

**Fig. S4** Representative  $^1\text{H}$  NMR spectrum of Zr-UiO-66-NHCS-Trp dissolved in NaOH- $\text{D}_2\text{O}$  solution (ca. 50% modified). Unmodified Zr-UiO-66- $\text{NH}_2$  and functionalized linker were identified at a peak area of 7.0–8.5 ppm.

#### 5. Synthesis of Zr-UiO-66-NHCS-Pro

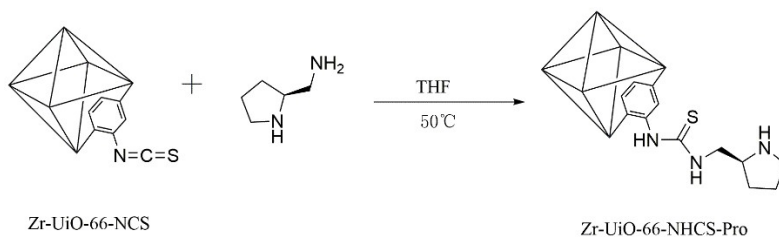

In a 50 mL round-bottomed flask, 1.20 mmol of Pyrrolidine-2-methylamine was dispersed in 20 mL of anhydrous tetrahydrofuran, and the required amount of Zr-UiO-66- $\text{NH}_2$  was added (1.00 mmol). The solution was stirred at  $50^\circ\text{C}$  for 24 h. Then, it was then centrifuged, and the solid was washed with THF ( $3 \times 10$  mL) to obtain as a fine yellow powder after drying in vacuo at  $50^\circ\text{C}$ .

$^1\text{H}$  NMR (500 MHz, Deuterium Oxide)  $\delta$  8.35 (s, 1H), 8.03 (d,  $J = 7.7$  Hz, 1H), 7.43 – 7.35 (m, 1H), 2.89 – 2.77 (m, 1H), 2.69 – 2.54 (m, 2H), 2.48 – 2.35 (m, 1H), 1.94-1.93 (m, 1H), 1.77-1.70 (m, 1H), 1.60 – 1.51 (m, 3H).

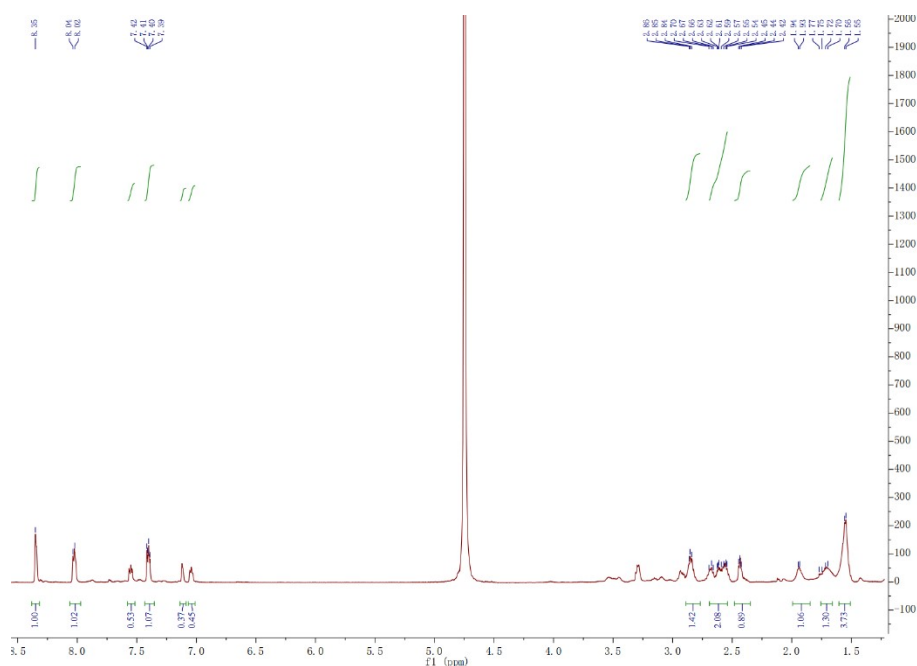

**Fig. S5** Representative  $^1\text{H}$  NMR spectrum of Zr-UiO-66-NHCS-Pro dissolved in NaOH- $\text{D}_2\text{O}$  solution (ca. 67 % modified). Unmodified Zr-UiO-66- $\text{NH}_2$  and functionalized linker were identified at a peak area of 7.0–8.5 ppm.

#### 6. Synthesis of Zr-UiO-67-NHCS-Pro

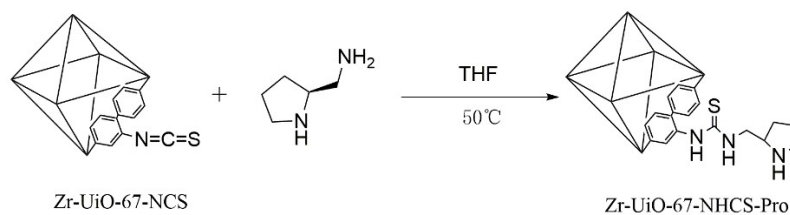

In a 50 mL round-bottomed flask, 1.20 mmol of Pyrrolidine-2-methylamine was dispersed in 20 mL of anhydrous tetrahydrofuran, and the required amount of Zr-UiO-67- $\text{NH}_2$  was added (1.00 mmol). The solution was stirred at  $50^\circ\text{C}$  for 24 h. Then, it was then centrifuged, and the solid was washed with THF ( $3 \times 10$  mL) to obtain as a fine yellow powder after drying in vacuo at  $50^\circ\text{C}$ .

$^1\text{H}$  NMR (500 MHz, Deuterium Oxide)  $\delta$  7.74-7.72 (m, 3H), 7.52 (d,  $J = 8.3$  Hz, 2H), 7.19 – 7.15 (m, 1H), 2.78-2.72 (m, 1H), 2.63 – 2.47 (m, 2H), 2.35-2.32 (m, 2H), 2.03 (s, 1H), 1.65-1.60 (m, 1H), 1.51 – 1.40 (m, 2H), 1.11 – 0.99 (m, 1H).

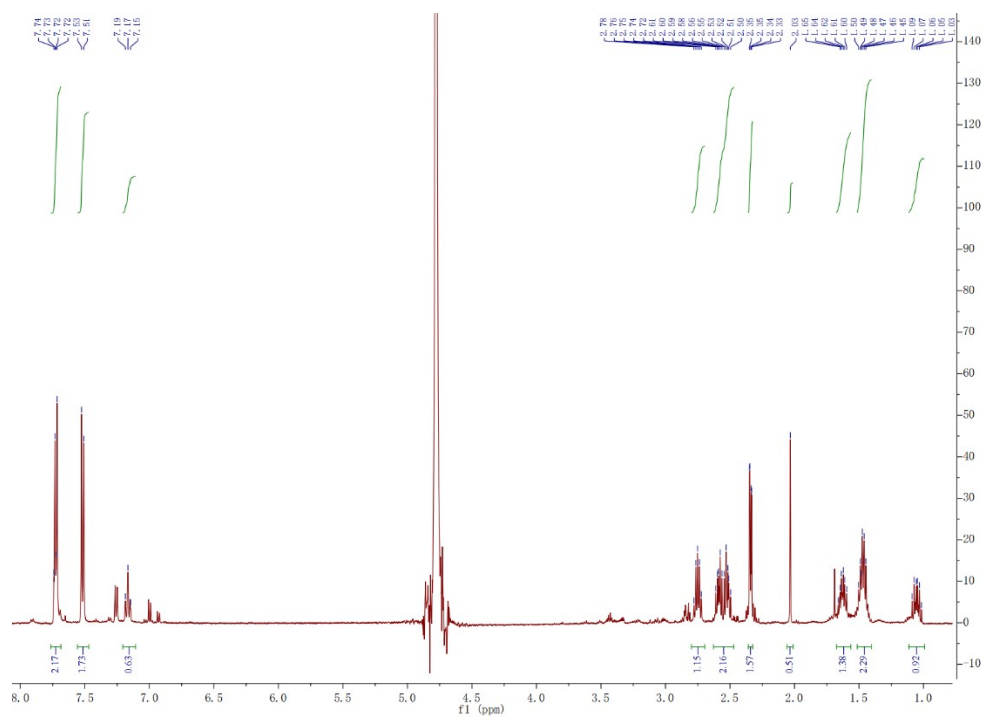

**Fig. S6** Representative  $^1\text{H}$  NMR spectrum of Zr-UiO-67-NHCS-Pro dissolved in NaOH- $\text{D}_2\text{O}$  solution (ca. 63 % modified). Unmodified Zr-UiO-67- $\text{NH}_2$  and functionalized linker were identified at a peak area of 7.0–8.0 ppm.

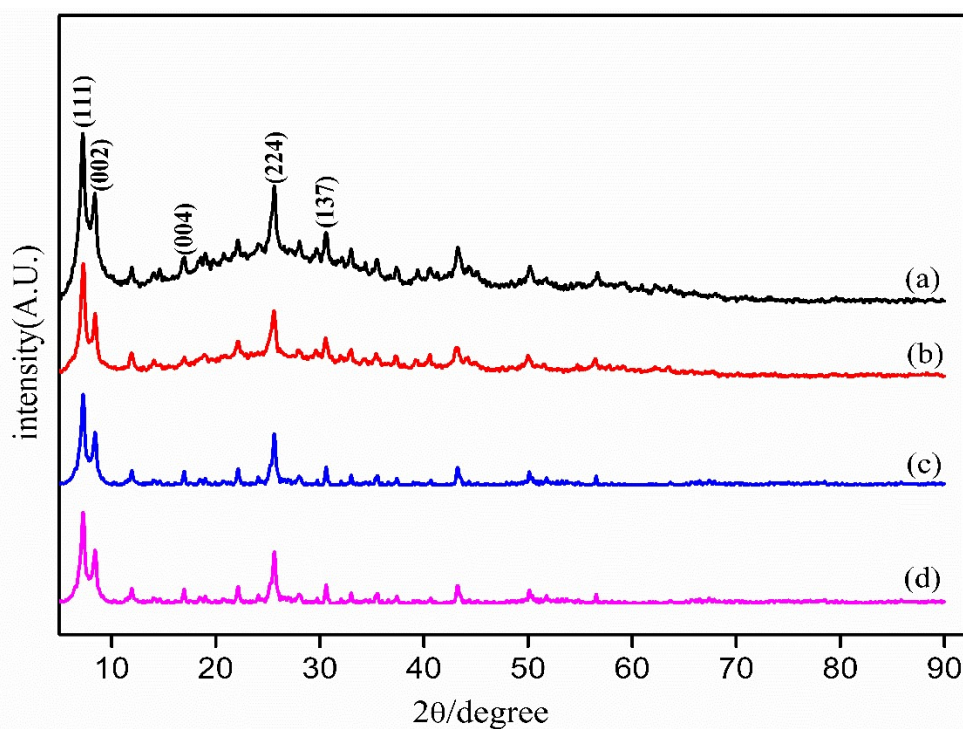

**Fig. S7** PXRD patterns of different catalysts. (a) Zr-UiO-66-NHCS-Leu. (b) Zr-UiO-66-NHCS-Ile. (c) Zr-UiO-66-NHCS-Lte. (d) Zr-UiO-66-NHCS-Trp. (e) Zr-UiO-66-NHCS-Pro.

### Catalysis of aldol reaction

$$ee = \frac{Area_{max} - Area_{min}}{Area_{max} + Area_{min}}$$

In a typical catalytic run, 30 mg of Zr-UiO-66-NHCS-Pro which corresponds to 0.05 mmol of proline moiety, was suspended in a solution of p-nitro-benzaldehyde (30 mg, 0.20 mmol) in acetone (1 mL). The suspension was allowed to react at room temperature and monitored by thin layer chromatography (TLC). After two days, the p-nitro-benzaldehyde was vanished from TLC. Then, the suspension was centrifuged. The solid catalyst was washed by CH<sub>2</sub>Cl<sub>2</sub> (3×1 mL); the organic phases were combined and separated by TLC. Then, after concentration, a pale-yellow solid was obtained. <sup>1</sup>H NMR (500 MHz, Chloroform-*d*) δ 8.21 (d, *J* = 8.8 Hz, 2H), 7.54 (d, *J* = 8.8 Hz, 2H), 5.27 (m, 1H), 2.86 (m, 2H), 2.23 (s, 3H) and it was analyzed by HPLC (AS-H column, hexane: isopropanol = 70:30, 1 mL/min, 254 nm) to obtain enantiomeric excess (ee).

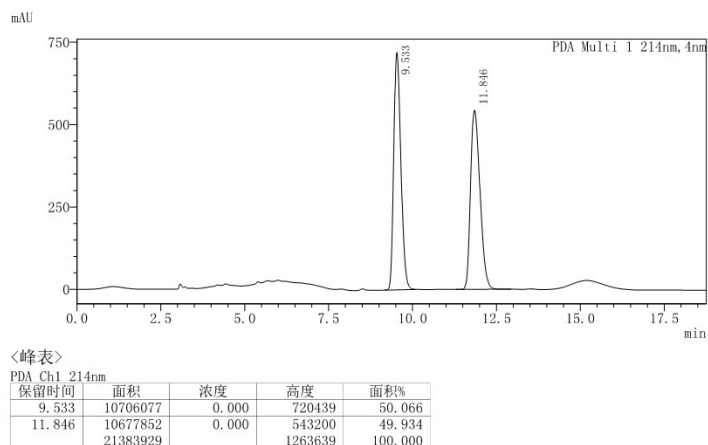

Fig. S8 HPLC of racemic modification.

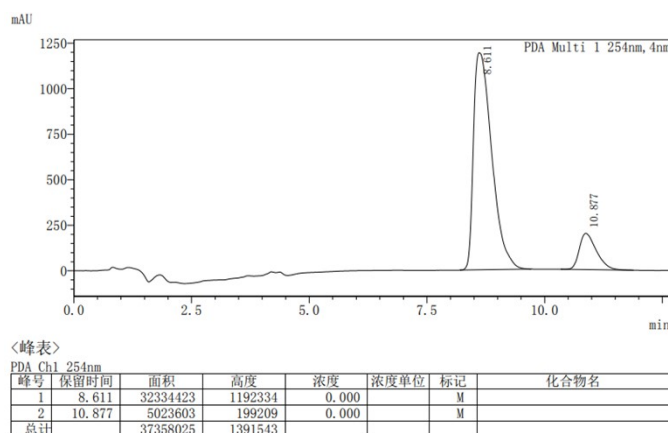

Fig. S9 Typical HPLC trace for the aldol reaction catalyzed by Zr-UiO-66-NHCS-Pro (cycle 1, 83% yield, 73% ee).

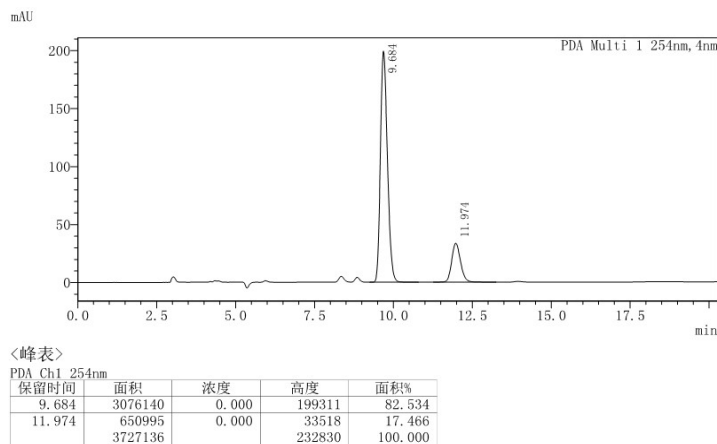

Fig. S10 Typical HPLC trace for the aldol reaction catalyzed by Zr-UiO-66-NHCS-Pro (cycle 2, acetone, 68% yield, 65% ee).



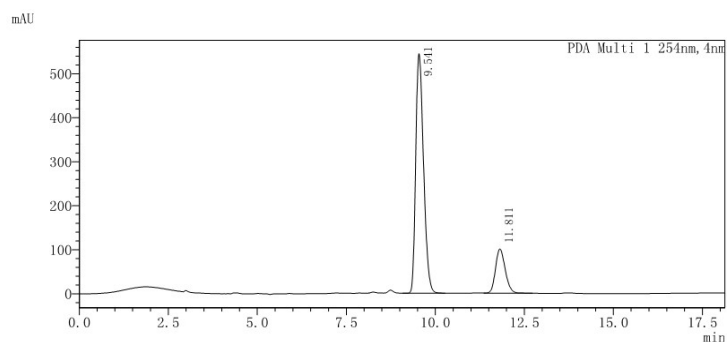

<峰表>

| 保留时间   | 面积       | 浓度    | 高度     | 面积%     |
|--------|----------|-------|--------|---------|
| 9.541  | 8329137  | 0.000 | 544451 | 81.454  |
| 11.811 | 1896427  | 0.000 | 100246 | 18.546  |
|        | 10225563 |       | 644696 | 100.000 |

Fig. S11 Typical HPLC trace for the aldol reaction catalyzed by Zr-UiO-66-NHCS-Pro (cycle 3, 65% yield, 63% ee).

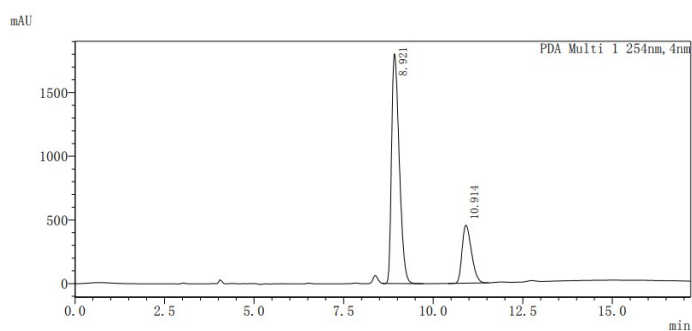

<峰表>

| 峰号 | 保留时间   | 面积       | 高度      | 浓度    | 浓度单位 | 标记 | 化合物名 |
|----|--------|----------|---------|-------|------|----|------|
| 1  | 8.921  | 27021724 | 1800593 | 0.000 |      | M  |      |
| 2  | 10.914 | 8306958  | 455464  | 0.000 |      | M  |      |
| 总计 |        | 35328681 | 2256057 |       |      |    |      |

Fig. S12 Typical HPLC trace for the aldol reaction catalyzed by Zr-UiO-66-NHCS-Pro (cycle 4, 60% yield, 54% ee).

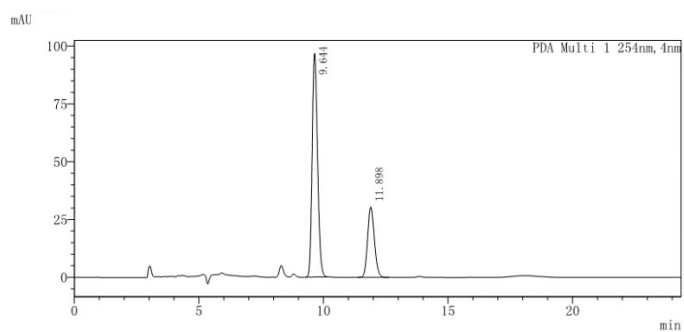

<峰表>

| 保留时间   | 面积      | 浓度    | 高度     | 面积%     |
|--------|---------|-------|--------|---------|
| 9.644  | 1452475 | 0.000 | 96797  | 71.677  |
| 11.898 | 573936  | 0.000 | 30324  | 28.323  |
|        | 2026411 |       | 127121 | 100.000 |

Fig. S13 Typical HPLC trace for the aldol reaction catalyzed by Zr-UiO-66-NHCS-Pro (cycle 5, 55% yield, 43% ee).
